# Supplementary material for: Quantitative and qualitative analysis of ionic solvation of individual ions of imidazolium based ionic liquids in significant solution systems by conductance and FT-IR spectroscopy
Source: Royal Society of Chemistry journal article supplement (doi:10.1039/c3ra48051h), 2014-01-01
Supplement: c3ra48051h1.pdf [file c3ra48051h1.pdf]

## **Supporting Information**

### **Quantitative and Qualitative Analysis of Ionic Solvation of Individual Ions of Imidazolium Based Ionic Liquids in Significant Solution Systems by Conductance and FT-IR Spectroscopy**

**Deepak Ekka and Mahendra Nath Roy\***

Department of Chemistry, University of North Bengal, Darjeeling-734013, India

---

#### **Figure Captions:**

**Figure S1.** Stretching frequency of  $\text{-C}\equiv\text{N}$  in acetonitrile (black solid line), in  $\{[\text{emim}]\text{NO}_3+\text{CH}_3\text{CN}\}$  (red solid line), in  $\{[\text{emim}]\text{CH}_3\text{SO}_3+\text{CH}_3\text{CN}\}$  (violet solid line), in  $\{[\text{emim}]\text{Tos}+\text{CH}_3\text{CN}\}$  (blue solid line).

**Figure S2.** Stretching frequency of  $\text{-O-H}$  in methanol (black solid line), in  $\{[\text{emim}]\text{NO}_3+\text{CH}_3\text{OH}\}$  (red solid line), in  $\{[\text{emim}]\text{CH}_3\text{SO}_3+\text{CH}_3\text{OH}\}$  (violet solid line), in  $\{[\text{emim}]\text{Tos}+\text{CH}_3\text{OH}\}$  (blue solid line).

**Figure S3.** Stretching frequency of  $\text{-N-O}$  in nitromethane (black solid line), in  $\{[\text{emim}]\text{NO}_3+\text{CH}_3\text{NO}_2\}$  (red solid line), in  $\{[\text{emim}]\text{CH}_3\text{SO}_3+\text{CH}_3\text{NO}_2\}$  (violet solid line), in  $\{[\text{emim}]\text{Tos}+\text{CH}_3\text{NO}_2\}$  (blue solid line).

**Figure S4.** Stretching frequency of  $\text{-N-H}$  in methylamine solution (black solid line), in  $\{[\text{emim}]\text{NO}_3+\text{CH}_3\text{NH}_2\}$  (red solid line), in  $\{[\text{emim}]\text{CH}_3\text{SO}_3+\text{CH}_3\text{NH}_2\}$  (violet solid line), in  $\{[\text{emim}]\text{Tos}+\text{CH}_3\text{NH}_2\}$  (blue solid line)

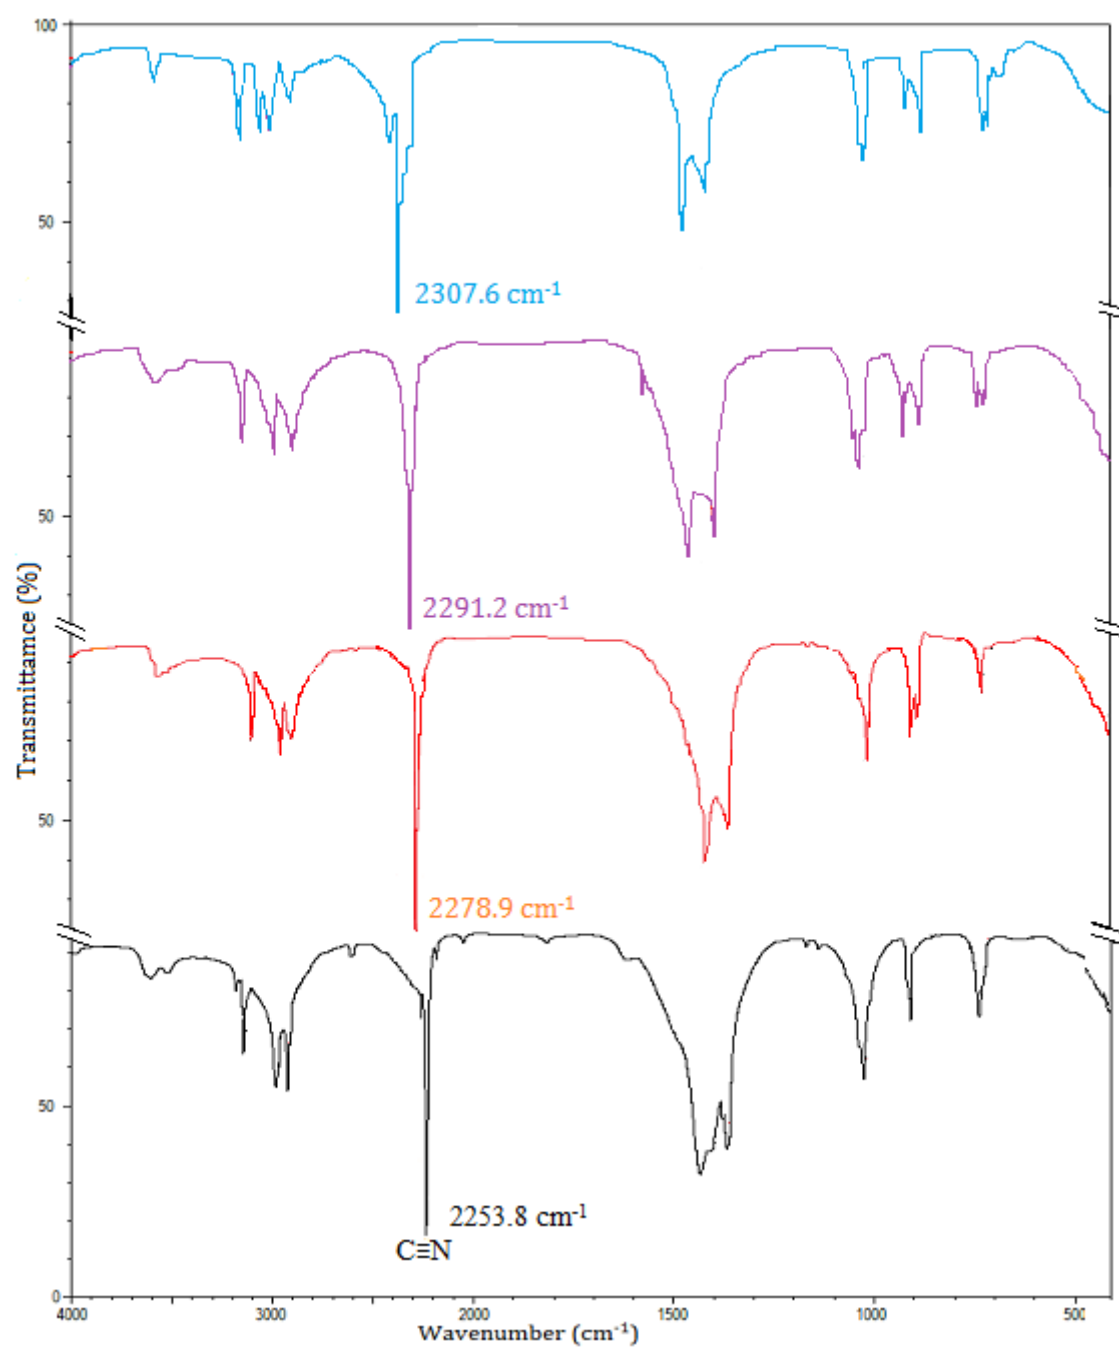

**Figure S1.**

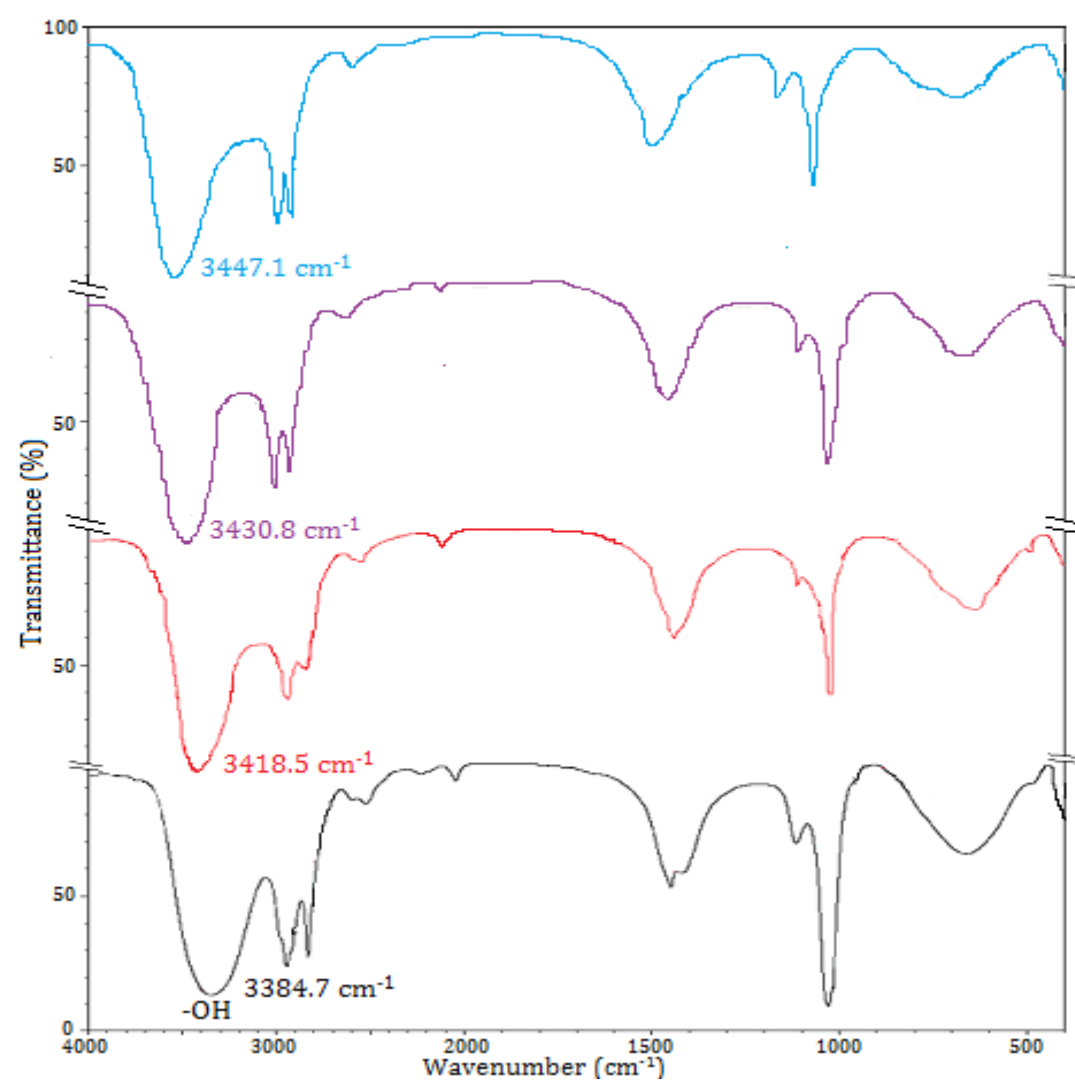

**Figure S2.**

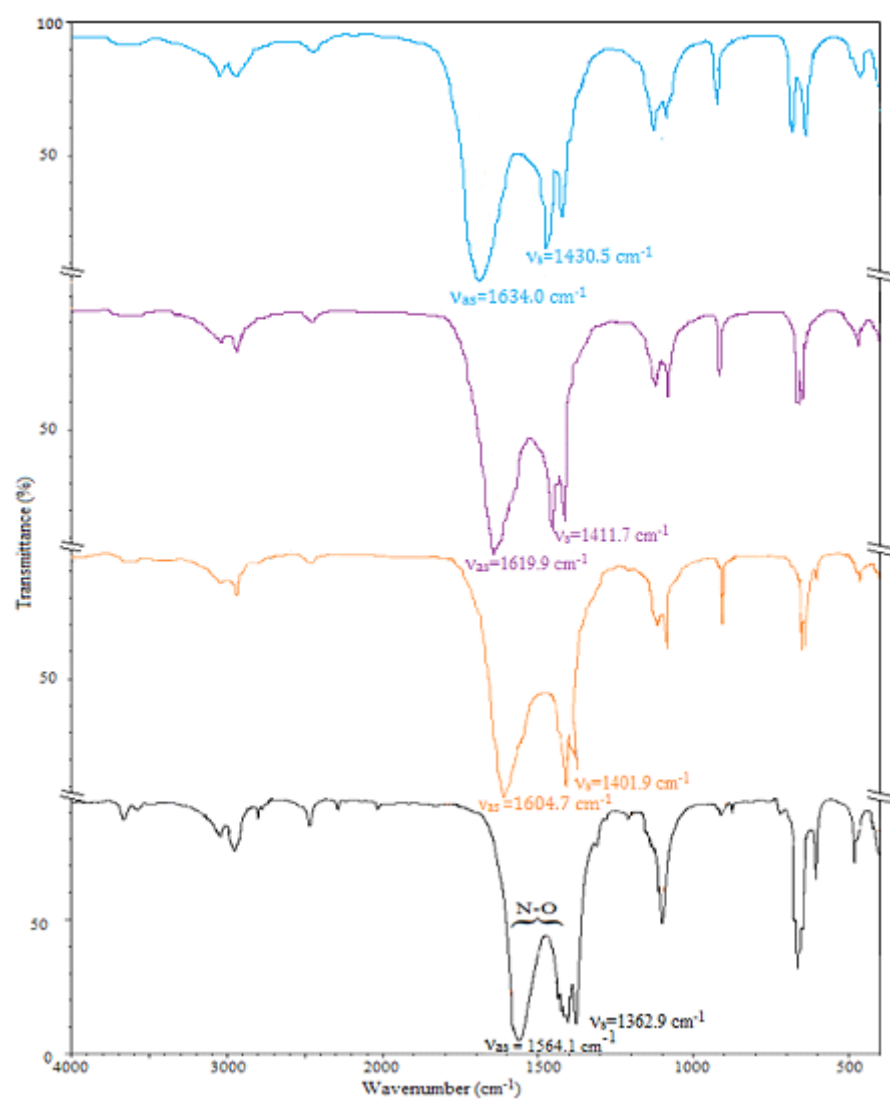

**Figure S3.**

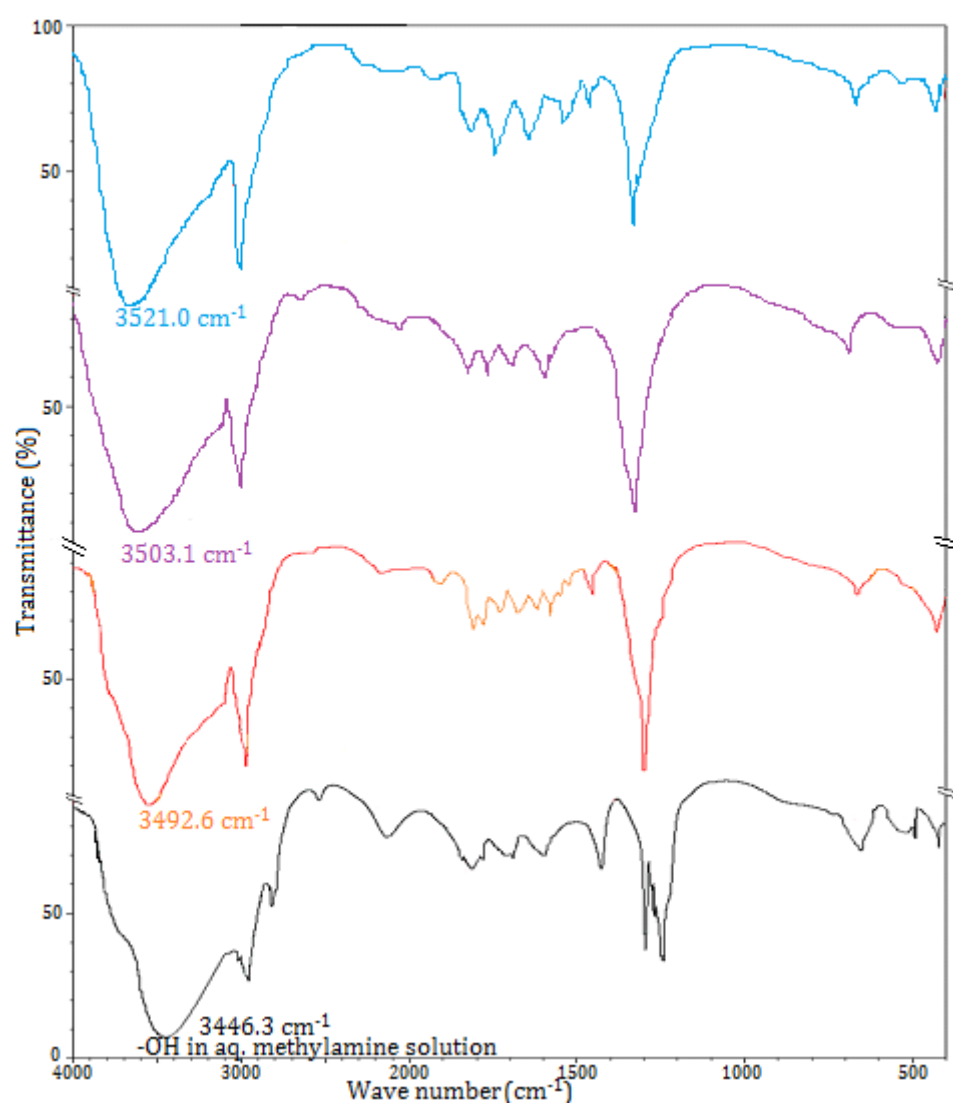

Figure S4.
